RESEARCH ARTICLE

# Simultaneous determination of 3-hydroxypropionic acid, methylmalonic acid and methylcitric acid in dried blood spots: Second-tier LC-MS/MS assay for newborn screening of propionic acidemia, methylmalonic acidemias and combined remethylation disorders

Péter Monostori<sup>1</sup>\*, Glynis Klinke<sup>1</sup>, Sylvia Richter<sup>1</sup>, Ákos Baráth<sup>2</sup>, Ralph Fingerhut<sup>3</sup>, Matthias R. Baumgartner<sup>3</sup>, Stefan Kölker<sup>1</sup>, Georg F. Hoffmann<sup>1</sup>, Gwendolyn Gramer<sup>1</sup>, Jürgen G. Okun<sup>1</sup>

**1** Department of General Pediatrics, Division of Neuropediatrics and Metabolic Medicine, Center for Pediatric and Adolescent Medicine, University Hospital Heidelberg, Heidelberg, Germany, **2** Department of Pediatrics, University of Szeged, Szeged, Hungary, **3** Children's Research Center, Division of Metabolism, University Children's Hospital Zurich, Zurich, Switzerland

\* These authors contributed equally to this work.

\* [monostoripeter@gmail.com](mailto:monostoripeter@gmail.com)

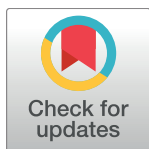

**OPEN ACCESS**

**Citation:** Monostori P, Klinke G, Richter S, Baráth Á, Fingerhut R, Baumgartner MR, et al. (2017) Simultaneous determination of 3-hydroxypropionic acid, methylmalonic acid and methylcitric acid in dried blood spots: Second-tier LC-MS/MS assay for newborn screening of propionic acidemia, methylmalonic acidemias and combined remethylation disorders. *PLoS ONE* 12(9): e0184897. <https://doi.org/10.1371/journal.pone.0184897>

**Editor:** Mohana Krishna Reddy Mudiam, Indian Institute of Chemical Technology, INDIA

**Received:** May 31, 2017

**Accepted:** September 1, 2017

**Published:** September 15, 2017

**Copyright:** © 2017 Monostori et al. This is an open access article distributed under the terms of the [Creative Commons Attribution License](https://creativecommons.org/licenses/by/4.0/), which permits unrestricted use, distribution, and reproduction in any medium, provided the original author and source are credited.

**Data Availability Statement:** All relevant data are within the paper and its Supporting Information files.

**Funding:** This work and the pilot study "Newborn screening 2020" at the Newborn Screening Center of the University Hospital Heidelberg are generously supported by the Dietmar Hopp

## Abstract

### Background and aims

Increased propionylcarnitine levels in newborn screening are indicative for a group of potentially severe disorders including propionic acidemia (PA), methylmalonic acidemias and combined remethylation disorders (MMACBL). This alteration is relatively non-specific, resulting in the necessity of confirmation and differential diagnosis in subsequent tests. Thus, we aimed to develop a multiplex approach for concurrent determination of 3-hydroxypropionic acid, methylmalonic acid and methylcitric acid from the same dried blood spot (DBS) as in primary screening (second-tier test). We also set out to validate the method using newborn and follow-up samples of patients with confirmed PA or MMACBL.

### Methods

The assay was developed using liquid chromatography–tandem mass spectrometry and clinically validated with retrospective analysis of DBS samples from PA or MMACBL patients.

### Results

Reliable determination of all three analytes in DBSs was achieved following simple and fast (<20 min) sample preparation without laborious derivatization or any additional pipetting steps. The method clearly distinguished the pathological and normal samples and

Foundation, St. Leon Rot (<http://dietmar-hopp-stiftung.de>). We acknowledge the financial support of the Deutsche Forschungsgemeinschaft and Ruprecht-Karls-Universität Heidelberg within the funding programme Open Access Publishing. The funders had no role in study design, data collection and analysis, decision to publish, or preparation of the manuscript.

**Competing interests:** The authors have declared that no competing interests exist.

differentiated between PA and MMACBL in all stored newborn specimens. Methylcitric acid was elevated in all PA samples; 3-hydroxypropionic acid was also high in most cases. Methylmalonic acid was increased in all MMACBL specimens; mostly together with methylcitric acid.

## Conclusions

A liquid chromatography–tandem mass spectrometry assay allowing simultaneous determination of the biomarkers 3-hydroxypropionic acid, methylmalonic acid and methylcitric acid in DBSs has been developed. The assay can use the same specimen as in primary screening (second-tier test) which may reduce the need for repeated blood sampling. The presented preliminary findings suggest that this method can reliably differentiate patients with PA and MMACBL in newborn screening. The validated assay is being evaluated prospectively in a pilot project for extension of the German newborn screening panel (“Newborn screening 2020”; Newborn Screening Center, University Hospital Heidelberg).

## Introduction

Propionic acidemia (PA; OMIM 606054) and methylmalonic acidemias including methylmalonyl-CoA mutase, methylmalonyl-CoA epimerase and cobalamin (Cbl) A, B, C, D, F and J deficiencies (MMACBL; OMIM 251000, 251120, 251100, 251110, 277400, 277410, 277380 and 614857, respectively) are rare but potentially severe autosomal recessive disorders of propionate catabolism (Fig 1) [1–6]. Methylmalonyl-CoA mutase deficiency can be complete (MMAmut(0)) or partial (MMAmut(-)) [1]. The clinical symptoms of PA and MMACBL are widely variable and, in many cases, potentially life-threatening [1, 5, 6]. Various organs including the nervous and gastrointestinal systems, the heart and the kidney can be affected [1, 5, 6]. Accordingly, an early diagnosis by means of newborn screening (NBS) has been recommended by the American College of Medical Genetics and National Academy of Clinical Biochemistry [2–4] for PA, MMAmut deficiency and Cbl A and B defects, disorders having the highest potential for severe outcome [1, 5, 6].

In NBS, an increased propionylcarnitine (C3) level in dried blood spots (DBSs) is suggestive for either PA or MMACBL [1]. However, C3 elevation is not specific for these disorders due to an overlap of its concentration in affected and unaffected newborns, particularly in premature infants, which results in high false-positive rates [1, 7]. The use of analyte ratios such as C3/ acetylcarnitine (C3/C2) improves specificity, but still cannot differentiate between PA and MMACBL [1, 8]. This necessitates confirmation of primary screening results and differential diagnosis using more specific assays [1].

Traditionally, confirmation of PA has been performed from urine by detecting elevated levels of various biomarkers including 3-hydroxypropionic acid (3OHPA) and methylcitric acid (MCA), together with normal methylmalonic acid (MMA) concentrations (Fig 1) [1]. In MMACBL, urinary MMA and MCA are increased; 3OHPA may also be elevated (Fig 1) [1]. However, urine can only be obtained via patient recall which markedly delays time to diagnosis and initiation of treatment and may also generate unnecessary parental stress [1]. In turn, methods using the same DBS specimen as in the primary screening (second-tier tests) may reportedly reduce time to diagnosis and the number of recalls [9]. However, previous second-tier assays for PA and MMACBL [10–17] did not allow concurrent measurement of these

biomarkers from DBS and generally utilized time-consuming and laborious sample preparation [10–14].

Importantly, a simultaneous and selective measurement of all three relevant diagnostic biomarkers from DBS could allow the evaluation of their individual diagnostic values in DBS for differentiation between PA and MMACBL and as a result could reinforce the analytical confidence of the diagnosis. In addition, the applied method must also be able to separate two

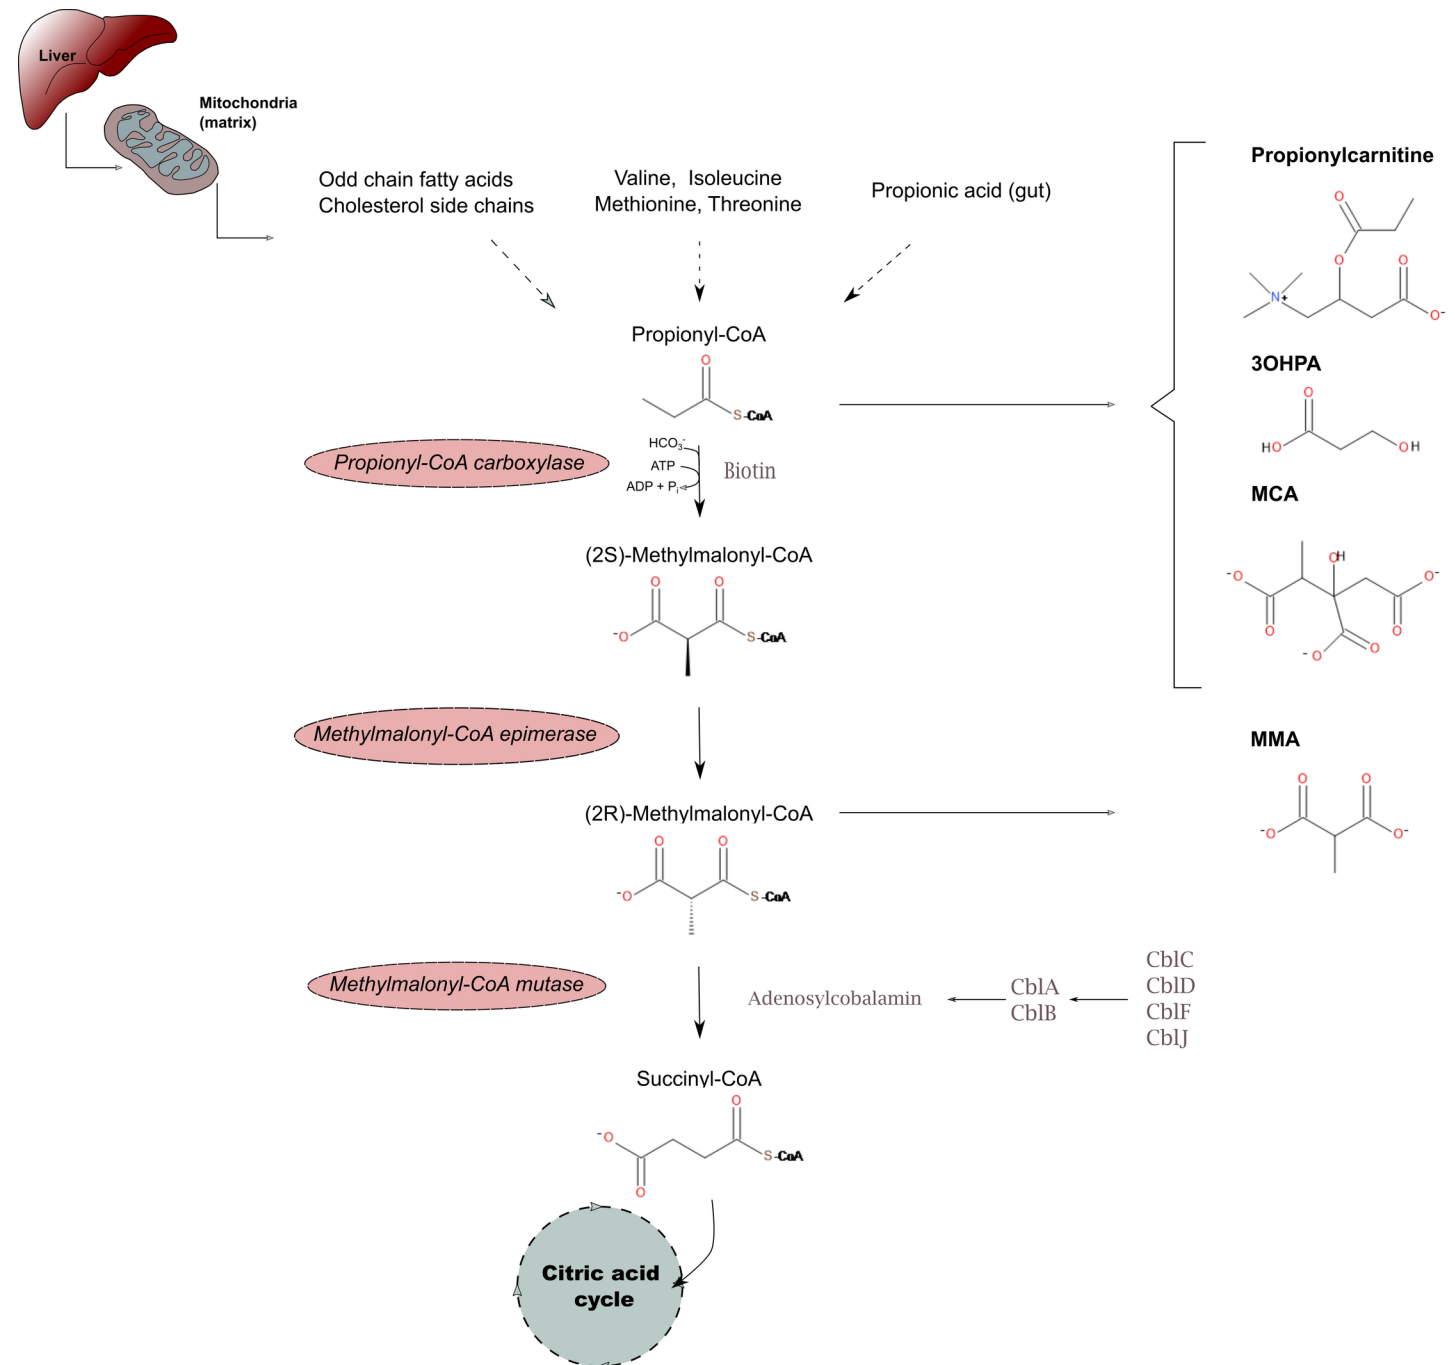

**Fig 1. Biochemical pathway of propionate metabolism (simplified).** 3OHPA: 3-hydroxypropionic acid; MMA: methylmalonic acid; MCA: methylcitric acid; Cbl: cobalamin. Drawn using Inkscape 0.91pre4 (Open Source Software licensed under the GNU General Public License).

<https://doi.org/10.1371/journal.pone.0184897.g001>

additional interfering substances, lactic acid and succinic acid (isobaric with 3OHPA and MMA, respectively), being highly abundant in blood [1].

Therefore, our aim was to develop a liquid chromatography–tandem mass spectrometry (LC-MS/MS) assay for the simultaneous determination of the biomarkers 3OHPA, MMA and MCA from DBS, while separating the isobaric metabolites lactic acid and succinic acid. We also set out to keep sample preparation simple and fast for easier inclusion of the assay in the routine workflow. To assess the relevance of the three biomarkers in DBS, we retrospectively analyzed specimens from known patients with PA or MMACBL before and during therapy using the successfully developed assay.

## Materials and methods

### Reagents

Unlabelled 3OHPA, lactic acid, succinic acid, MMA, MCA and zinc sulfate heptahydrate ( $\text{ZnSO}_4 \cdot 7\text{H}_2\text{O}$ ) were purchased from Sigma-Aldrich (St. Louis, MO, USA); deuterated internal standards (ISs)  $\text{d}_3$ -MMA from Cambridge Isotope Laboratories (Andover, MA, USA);  $\text{d}_3$ -lactic acid and  $\text{d}_3$ -MCA from CDN Isotopes (Pointe-Claire, Quebec, Canada); methanol, acetonitrile and formic acid (all ULC-MS grade) from Biosolve (Valkenswaard, The Netherlands). Ultrapure water (18.2 M $\Omega$ .cm), filtered through a 0.22  $\mu\text{m}$  pore size membrane, was obtained from a Thermo Barnstead GenPure Pro UV-TOC/UF system (Thermo Fisher Scientific, Waltham, MA, USA).

### Sample preparation

Two spots 3.2 mm in diameter of each of the DBS calibrators, Quality Controls (QCs) and the patient samples (corresponding to 6.4  $\mu\text{l}$  blood) were punched out from filter cards and placed into Merck Ultrafree-MC VV 0.1  $\mu\text{m}$  centrifugal filter units (Darmstadt, Germany). The IS working solution (composition: 20, 1.7, and 0.50  $\mu\text{M}$  for  $\text{d}_3$ -lactic acid,  $\text{d}_3$ -MMA and  $\text{d}_3$ -MCA, respectively) was prepared fresh daily by a 5-fold dilution of a deuterated IS intermediate stock solution (stored in aliquots at  $-20^\circ\text{C}$ ) with methanol/water 50/50 (v/v). To each sample, 120  $\mu\text{l}$  IS working solution plus 10  $\mu\text{l}$  50 mM  $\text{ZnSO}_4$  solution (in methanol) were added. The samples were sealed, vortexed for 5 min, and centrifuged for 10 min at  $5000 \times g$  in a Heraeus Biofuge Pico centrifuge (Hanau, Germany) at ambient temperature. After removal of the lid and filter, the tubes were placed directly into the autosampler. The analyte levels in DBS calibrators Cal0 to Cal6 (stored at  $-20^\circ\text{C}$ ) were as follows: 0, 12.5, 25, 50, 100, 200, 400  $\mu\text{M}$  for 3OHPA; 0, 1.25, 2.5, 5.0, 10, 20, 40  $\mu\text{M}$  for MMA; and 0, 0.25, 0.50, 1.0, 2.0, 4.0, 8.0  $\mu\text{M}$  for MCA, respectively. The analyte levels in QC1, QC2 and QC3 (stored at  $-20^\circ\text{C}$ ) were the following: 20, 60, 100  $\mu\text{M}$  for 3OHPA; 2.0, 30, 100  $\mu\text{M}$  for MMA; and 0.40, 1.2, 4.0  $\mu\text{M}$  for MCA, respectively. The preparation of standard stock solutions, DBS calibrators and QCs are further detailed in [S1 Text](#).

### LC-MS/MS instruments and settings

A Waters Acquity I-Class UPLC system (Binary Solvent Manager, thermostatic Column Manager and FTN Sample Manager) and a Waters TQ-S triple quadrupole MS/MS were used, controlled by MassLynx 4.1 software (all Waters, Milford, MA, USA). MS/MS data were evaluated with TargetLynx 4.1 software (Waters, Milford, MA, USA).

The chromatographic separation of the analytes was performed on a Phenomenex Gemini C6-Phenyl 150 $\times$ 2.0 mm, 3  $\mu\text{m}$  analytical column and a SecurityGuard C6-Phenyl 20 mm I.D. cartridge guard column (both Phenomenex, Torrance, CA, USA). Eluent A consisted of ultrapure water plus 0.4% formic acid (ULC-MS grade). Eluent B consisted of methanol/

acetonitrile 50/50 (both ULC-MS grade). Both eluents were prepared weekly. The column was tempered to 25°C. The autosampler settings were the following: injection volume: 5 µl; sample compartment temperature: 5°C. Gradient elution at a flow of 200 µl/min was performed by changing %B as follows: 0.0-1.5 min: 10%; 1.5-2.5 min: 10% to 30%; 2.5-4.0 min: 30%; 4.0-4.1 min: 30% to 10%; 4.1-10.0 min: 10%. Experience with further extraction solvents, columns and eluents, derivatization and isocratic elution obtained during method development are provided in [S1 Table](#).

MS/MS settings were optimized by means of consecutive syringe infusions of 10 µM solutions for each analyte and IS, dissolved in ultrapure water. All analytes and ISs were measured in negative electrospray ion mode; the dwell times were 20 ms each. Optimized MS/MS settings are summarized in [Table 1](#). The final ion source settings were the following: desolvation gas flow = 800 L/h; cone gas flow = 150 L/h; nebulizer = 6.0 bar; capillary voltage = 2.5 kV; desolvation temperature = 650°C; source temperature = 150°C.

### Application of the LC-MS/MS test on patient samples with PA and MMACBL and external quality control samples

Clinical validation of the LC-MS/MS assay was performed retrospectively using 79 DBS samples from 32 different patients with PA or MMACBL from the NBS and Metabolic Centers in Heidelberg (Germany), Szeged (Hungary) and Zurich (Switzerland). In 14 patients, the newborn specimens prior to therapy initiation were also available (PA: *n* = 4; CblB *n* = 1; CblC *n* = 9); all other samples were obtained during therapy. Storage duration of the patient specimens before second-tier analysis in median (range) was 0.61 (0.01-8.90) years. For additional characterization of samples, we used the first-tier acylcarnitine profiles (electrospray ionization-MS/MS [18–20]) determined both at time of blood sampling at the respective site providing the specimen, as well as after storage (measured at the NBS Centers Heidelberg and Szeged). First-tier cutoff values for C3 and C3/C2 in the respective laboratories were the following: Heidelberg 5.5 µM and 0.22; Szeged: 5.75 µM and 0.26; and Zurich: 6.0 µM and 0.17. The 3OHPA, MMA and MCA levels were also measured in External Quality Assurance DBS samples for NBS (*n* = 7) from ERNDIM.

The validated assay is currently being evaluated prospectively in a pilot project for the extension of the German NBS panel named “Newborn screening 2020” at the NBS Center Heidelberg. In that prospective study, the reported LC-MS/MS assay is being applied as second-tier test using the same DBS specimen as in the primary screening.

All procedures followed were in accordance with the ethical standards of the Helsinki Declaration of 1975, as revised in 2000. Written informed consent for regular newborn screening

**Table 1. Optimized MS/MS settings in the second-tier LC-MS/MS assay (negative electrospray ion mode).**

| Analyte                     | Parent mass (Da) | Daughter mass (Da) | Cone voltage (V) | Collision voltage (V) |
|-----------------------------|------------------|--------------------|------------------|-----------------------|
| 3OHPA                       | 88.9             | 59.0               | -48              | -10                   |
| Lactic acid                 | 88.9             | 43.0               | -46              | -11                   |
| d <sub>3</sub> -Lactic acid | 92.0             | 45.1               | -46              | -11                   |
| Succinic acid               | 116.9            | 72.9               | -47              | -12                   |
| MMA                         | 117.0            | 73.0               | -30              | -12                   |
| d <sub>3</sub> -MMA         | 120.0            | 76.1               | -30              | -10                   |
| MCA                         | 205.0            | 125.1              | -35              | -13                   |
| d <sub>3</sub> -MCA         | 208.0            | 87.1               | -35              | -18                   |

3OHPA: 3-hydroxypropionic acid; MMA: methylmalonic acid; MCA: methylcitric acid.

<https://doi.org/10.1371/journal.pone.0184897.t001>

had been obtained from the parents of all individuals at time of blood sampling if required by national legislation. The anonymized, retrospective re-analysis of the specimens in the present study was approved by the Ethical Committees of the University of Szeged (217/2016-SZTE) and the University Children’s Hospital Zurich (2014-0211). At the University Hospital Heidelberg, parents of patients under treatment gave written informed consent for sample analysis for establishment of the second-tier strategies for the study NBS 2020. The study NBS 2020 was approved by the Ethical Committee of the University of Heidelberg (S-533/2015).

## Results

### Method validation

The linearity, the limit of detection (LOD) and the lower limit of quantitation (LLOQ) were tested with various concentrations of calibrator DBSs ( $n = 10$ ). LOD was defined as  $S/N = 3$ ; LLOQ was defined as the lowest concentration measured with a coefficient of variation (CV) lower than 20%. The coefficient of determination for linearity ( $R^2$ ) was 0.9702 for 3OHPA, 0.9946 for MMA and 0.9926 for MCA (Table 2). The LOD and LLOQ values for 3OHPA, MMA and MCA were: 15  $\mu\text{M}$ , 1.5  $\mu\text{M}$ , 0.05  $\mu\text{M}$ ; and 20  $\mu\text{M}$ , 2.5  $\mu\text{M}$ , 0.07  $\mu\text{M}$ , respectively (Table 2).

The retention times of 3OHPA and MMA were 2.4 min and 3.9 min, respectively. Of note, MCA and  $d_3$ -MCA are both detected in two chromatographic peaks (Figs 2–4). In case of  $d_3$ -MCA, the first peak at 3.7 min reportedly corresponds to the (2R, 3S) and (2S, 3R) stereoisomers; and the second peak at 4.2 min to (2R, 3R) and (2S, 3S) [21, 22]. Of the four possible stereoisomers of unlabeled MCA, only two, (2R, 3S) and (2S, 3S) are physiological [21, 22]. The respective MCA and  $d_3$ -MCA peaks were summed during the evaluation of the concentrations.

The resolution of critical isobaric analyte pairs was determined using the Cal5 DBS calibrator ( $n = 10$ ), by averaging retention times ( $t_1$  and  $t_2$ ) and peak widths at half peak height ( $w_{0.5,1}$  and  $w_{0.5,2}$ ) in 10 injections. Resolution ( $R_s$ ) was calculated via the following equation:  $R_s = 1.18 (t_2 - t_1) / (w_{0.5,1} + w_{0.5,2})$ . The critical isobaric pair succinic acid and MMA were baseline resolved ( $R_s = 2.7$ ). As the isobaric metabolites 3OHPA and lactic acid had specific daughter ions and therefore specific MRM transitions (Table 1), a chromatographic separation was not necessary for their determination. Despite extensive efforts, however, the 3OHPA peak could not be fully chromatographically separated from an interference peak having identical MRM transitions ( $R_s < 1.0$ ) (peaks 0 and 1 on Figs 2–4).

Interday and intraday precisions, variations between multiple injections of the same sample extract and recoveries were examined in QCs at three different concentrations ( $n = 10$ ) (Table 3). With the exception of the lowest MMA level (2.0  $\mu\text{M}$ ), the CV values were lower than 15% (Table 3). The recoveries ranged from 99.0–109.4%, except for the lowest 3OHPA level (20  $\mu\text{M}$ ) (Table 3).

**Table 2. Assay validation in calibrator dried blood spots ( $n = 10$ ).**

| Analyte | Linearity ( $R^2$ ) | LOD ( $\mu\text{M}$ ) | LLOQ ( $\mu\text{M}$ ) | Retention time (min)  |
|---------|---------------------|-----------------------|------------------------|-----------------------|
| 3OHPA   | 0.9702              | 15                    | 20                     | 2.4±0.01              |
| MMA     | 0.9946              | 1.5                   | 2.5                    | 3.9±0.01              |
| MCA     | 0.9926              | 0.05                  | 0.07                   | 3.7±0.01 and 4.2±0.01 |

3OHPA: 3-hydroxypropionic acid; MMA: methylmalonic acid; MCA: methylcitric acid;  $R^2$ : coefficient of determination; LOD: limit of detection; LLOQ: lower limit of quantitation.

<https://doi.org/10.1371/journal.pone.0184897.t002>

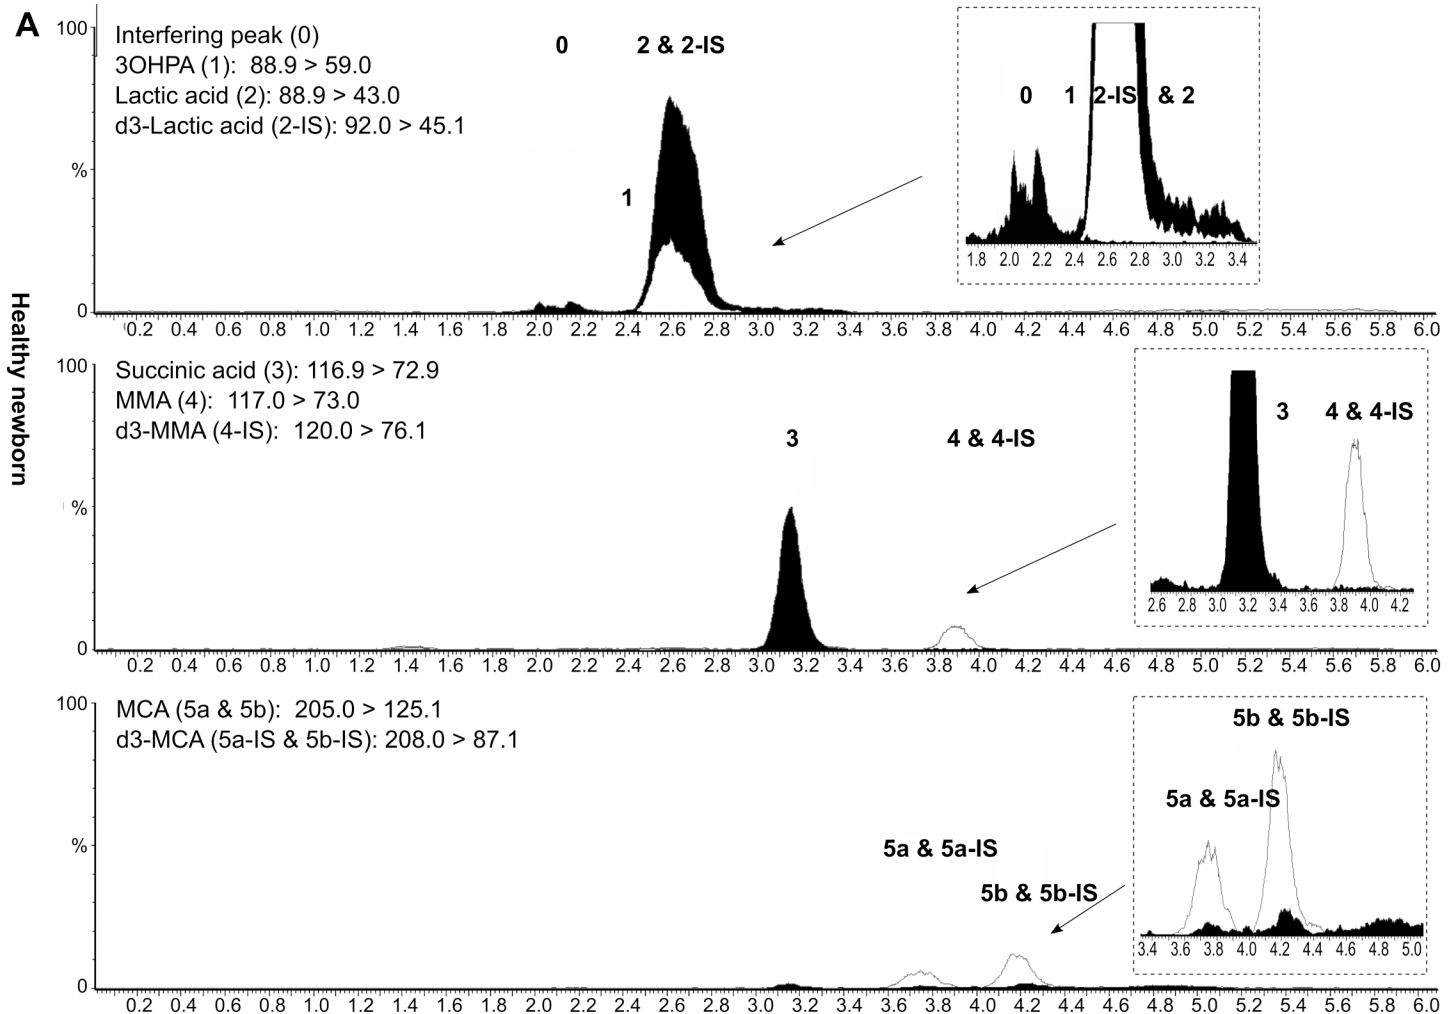

**Fig 2. LC-MS/MS chromatogram of DBS from a healthy newborn.** Peak 1: 3-hydroxypropionic acid (3OHPA); peak 2: lactic acid; peak 3: succinic acid; peak 4: methylmalonic acid (MMA); peaks 5a and 5b: methylcitric acid (MCA); peak 0: interfering peak; DBS: dried blood spot. Numbered black peaks: unlabelled analytes; numbered unfilled peaks: deuterated internal standards. All intensities (Y-axes) have been normalized to  $4 \times 10^5$  cps for better comparability (not on the inserted zoom-in figures) and have been plotted against retention time (X-axes). Chromatograms were generated by MassLynx 4.1 (Waters, Milford, MA, USA) and modified using Inkscape 0.91pre4 (Open Source Software licensed under the GNU General Public License).

<https://doi.org/10.1371/journal.pone.0184897.g002>

## Testing of the present assay with clinical specimens

For the determination of normal biomarker concentrations in the second-tier test, we used residual DBS samples ( $n = 250$ ) after primary NBS for amino acids and acylcarnitines. Blood samples (collected between 36-72 hours of age) with C3 levels lower than or equal to  $4.5 \mu\text{M}$  and ratios C3/C2 lower than or equal to 0.18 were randomly selected and anonymized prior to the analysis. The 99.9<sup>th</sup> percentiles in DBS of these newborns, chosen as cutoff values for the second-tier test, were: 3OHPA:  $38.13 \mu\text{M}$ ; MMA:  $2.29 \mu\text{M}$ ; and MCA:  $0.08 \mu\text{M}$ .

Results of the clinical validation of the LC-MS/MS assay by means of retrospective analysis of stored patient samples are summarized in Table 4. The second-tier test clearly distinguished the pathological and normal samples and differentiated between PA and MMACBL in all newborn specimens, despite marked degradation of C3 after storage (up to 95%) [23, 24], as compared with C3 levels at time of blood sampling. Similarly, most specimens obtained during

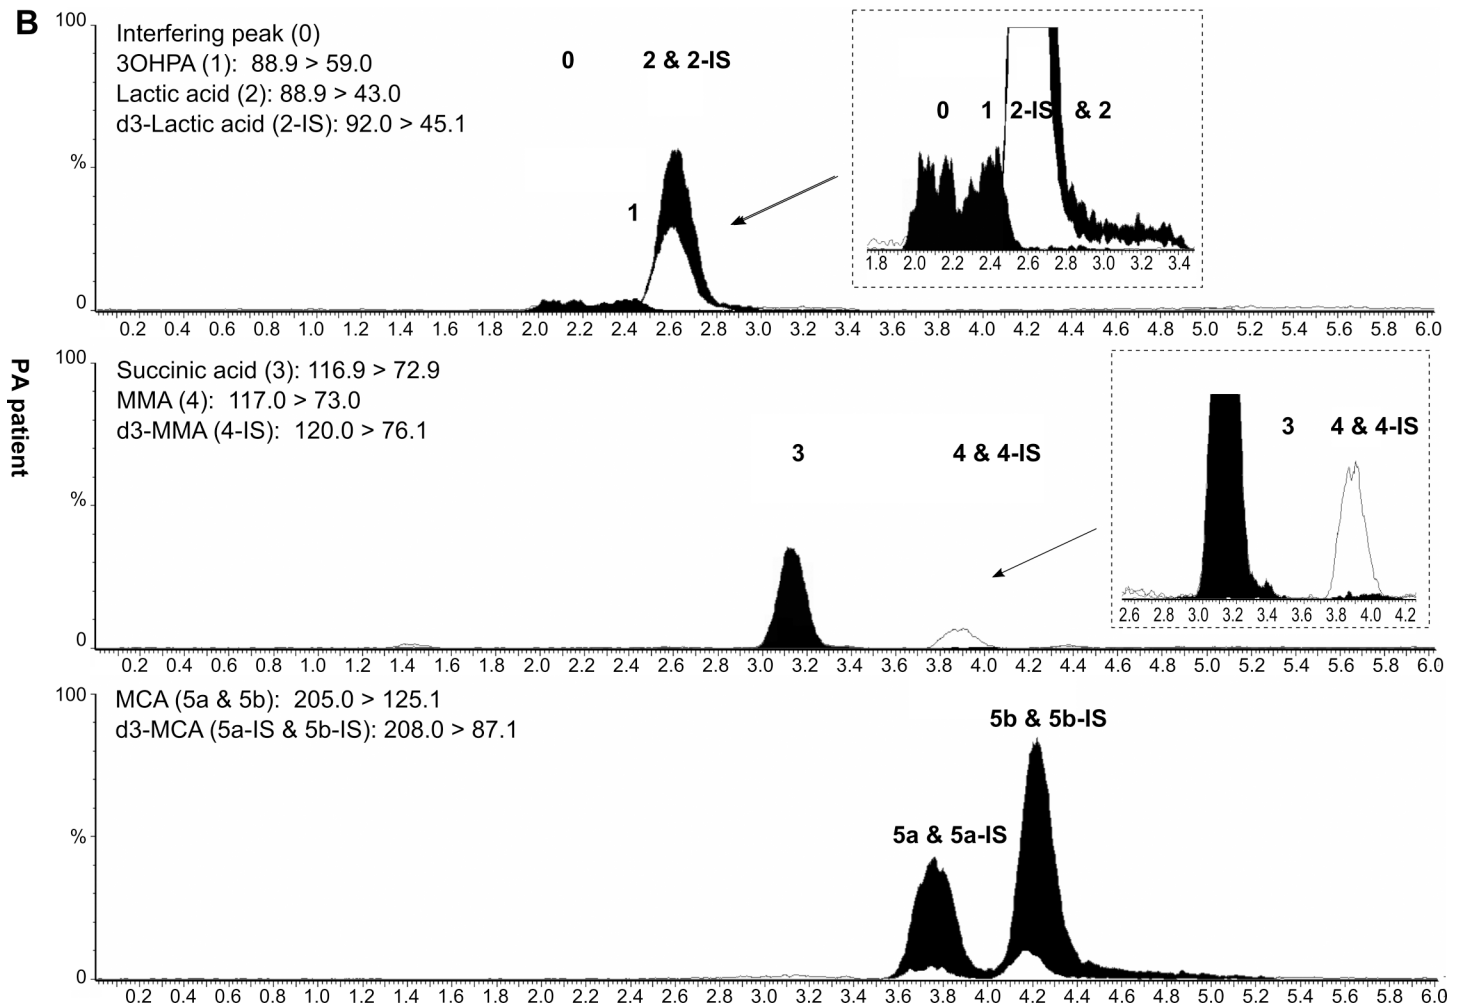

**Fig 3. LC-MS/MS chromatogram of DBS from a PA patient.** Peak 1: 3-hydroxypropionic acid (3OHPA); peak 2: lactic acid; peak 3: succinic acid; peak 4: methylmalonic acid (MMA); peaks 5a and 5b: methylcitric acid (MCA); peak 0: interfering peak; DBS: dried blood spot; PA: propionic acidemia. Numbered black peaks: unlabelled analytes; numbered unfilled peaks: deuterated internal standards. All intensities (Y-axes) have been normalized to  $4 \times 10^5$  cps for better comparability (not on the inserted zoom-in figures) and have been plotted against retention time (X-axes). Chromatograms were generated by MassLynx 4.1 (Waters, Milford, MA, USA) and modified using Inkscape 0.91pre4 (Open Source Software licensed under the GNU General Public License).

<https://doi.org/10.1371/journal.pone.0184897.g003>

therapy showed biomarker patterns characteristic for the respective disorder. As concerns PA samples, 3OHPA was normal in 2 out of 4 untreated newborn PA specimens and in 7 out of 21 PA samples on therapy. In these cases, only the elevated MCA could confirm the underlying disease. It has to be considered, that all four newborn PA specimens were subject to long-term storage (range 3.45-8.90 years). Storage time before analysis in the two NBS PA samples with normal 3OHPA was especially long (8.86 and 8.90 years).

Of note, in four MMACBL cases under treatment (MMAMut(-)  $n = 1$ ; CblC  $n = 3$ ), the second-tier results were still indicative of the disorder when the initial first-tier C3 and C3/C2 values were already in the normal range. In five additional patients under therapy (CblB  $n = 3$ ; CblC  $n = 2$ ), the first-tier and second-tier results were both normal. Representative LC-MS/MS chromatograms of DBS specimens from a healthy newborn, a PA and a MMAMut(0) patient are presented in Figs 2–4, respectively.



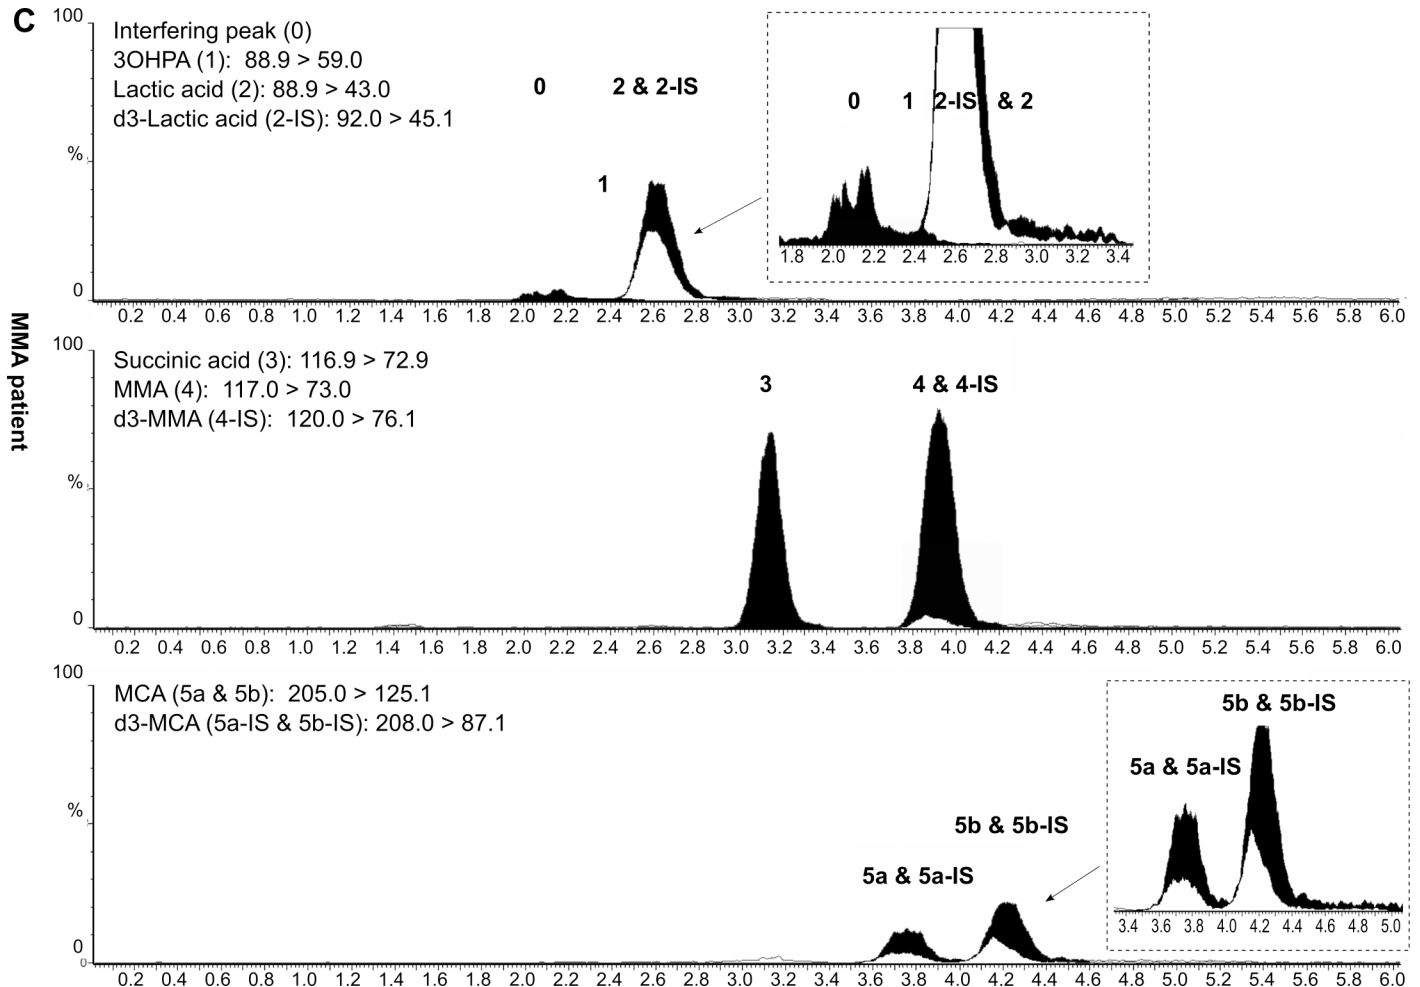

**Fig 4. LC-MS/MS chromatogram of DBS from a MMAMut(0) patient.** Peak 1: 3-hydroxypropionic acid (3OHPA); peak 2: lactic acid; peak 3: succinic acid; peak 4: methylmalonic acid (MMA); peaks 5a and 5b: methylcitric acid (MCA); peak 0: interfering peak; DBS: dried blood spot; MMAMut(0): methylmalonyl-CoA mutase deficiency (complete). Numbered black peaks: unlabelled analytes; numbered unfilled peaks: deuterated internal standards. All intensities (Y-axes) have been normalized to  $4 \times 10^5$  cps for better comparability (not on the inserted zoom-in figures) and have been plotted against retention time (X-axes). Chromatograms were generated by MassLynx 4.1 (Waters, Milford, MA, USA) and modified using Inkscape 0.91pre4 (Open Source Software licensed under the GNU General Public License).

<https://doi.org/10.1371/journal.pone.0184897.g004>

### Testing of the present assay with external quality control samples

The 3OHPA, MMA and MCA levels were measured in External Quality Assurance DBS samples for NBS ( $n = 7$ ) from ERNDIM. The second-tier test clearly differentiated between PA and MMACBL in all External Quality Assurance specimens (Table 5).

### Discussion

Despite potential benefits of NBS for PA and MMACBL [1, 25], these disorders are currently screened for in only few European countries (Austria, Belgium, Denmark, Hungary, Iceland, Portugal and Spain) [4, 26]. This is in part attributable to relatively high false-positive rates if NBS for these disorders is based solely on C3 results [1]. The relative non-specificity is due to an overlap of C3 concentrations in normal and affected individuals, particularly in prematures [1, 7]. Even if the specificity can be improved if the levels of other biomarkers such as free carnitine, C2, palmitoylcarnitine or methionine are also taken into account in respective ratios

**Table 3. Assay validation in dried blood spots using quality control samples at three concentrations (n = 10).**

| Analyte | Analyte level (µM) | CV (%) interday | CV (%) intraday | CV (%) between injections | Recovery (%) |
|---------|--------------------|-----------------|-----------------|---------------------------|--------------|
| 3OHPA   | 20                 | 9.2             | 10.8            | 10.7                      | 136.8        |
|         | 60                 | 14.3            | 13.4            | 8.0                       | 99.2         |
|         | 100                | 6.2             | 10.6            | 7.9                       | 106.8        |
| MMA     | 2.0                | 32.9            | 20.2            | 10.6                      | 108.1        |
|         | 30                 | 9.3             | 9.1             | 5.0                       | 99.0         |
|         | 100                | 12.9            | 10.5            | 3.3                       | 105.0        |
| MCA     | 0.40               | 10.2            | 9.1             | 2.2                       | 102.3        |
|         | 1.2                | 6.9             | 6.5             | 2.7                       | 104.4        |
|         | 4.0                | 11.3            | 6.0             | 2.0                       | 109.4        |

3OHPA: 3-hydroxypropionic acid; MMA: methylmalonic acid; MCA: methylcitric acid; CV: coefficient of variation.

<https://doi.org/10.1371/journal.pone.0184897.t003>

with C3 [1, 8], some cases may still be missed reportedly [27]. Thus, there is a need for assays that allow confirmation and differential diagnosis of primary screening results for PA and MMACBL [1]. Urine organic acid analysis by means of gas chromatography–mass spectrometry has been most commonly used, which can simultaneously detect various diagnostic biomarkers including 3OHPA, MMA and MCA (Fig 1) [1]. Other assays have used serum or plasma for the determination of one or two, but not all three, of these relevant biomarkers [28, 29].

In NBS, however, the DBS is the standard sample type due to its advantages, including the ease of sample collection, transportation, storage and stability [30]. The analysis of the same DBS specimen as in the primary screening (second-tier testing) may also reportedly decrease the necessity for recalls, shorten time to diagnosis and improve the cost- and time-effectiveness of screening [9, 31]. Moreover, previous studies highlighted the importance of avoiding unnecessary recalls by reporting significant increases in family anxiety and frequency of hospitalization in subjects with false-positive NBS results [32, 33].

**Table 4. Results of dried blood spot samples from patients with known diagnosis: Retrospective analysis of NBS specimens (untreated) and samples during therapy.** Data are provided as medians (ranges).

|         | Biomarker                 | First-tier test (initial analysis shortly after blood sampling) |                         | Second-tier test   |                       |                  |
|---------|---------------------------|-----------------------------------------------------------------|-------------------------|--------------------|-----------------------|------------------|
|         |                           | C3 (µM)                                                         | C3/C2                   | 3OHPA (µM)         | MMA (µM)              | MCA (µM)         |
|         | <b>Cutoff</b>             | <b>5.8 (5.5-6.0)</b>                                            | <b>0.22 (0.17-0.26)</b> | <b>38.13</b>       | <b>2.29</b>           | <b>0.08</b>      |
| NBS     | <b>Controls (n = 250)</b> | 1.9 (0.7-4.3)                                                   | 0.08 (0.04-0.18)        | n.d. (n.d.-38.8)   | 0.50 (n.d.-2.3)       | 0.02 (n.d.-0.08) |
| NBS     | <b>PA (n = 4)</b>         | 14.7 (10.4-25.0)                                                | 0.51 (0.24-1.94)        | 153.2 (20.9-367.2) | 1.8 (n.d.-2.0)        | 2.06 (0.11-2.85) |
| NBS     | <b>CblB (n = 1)</b>       | 6.3                                                             | 0.31                    | 42.1               | 21.9                  | 0.04             |
| NBS     | <b>CblC (n = 9)</b>       | 7.1 (2.9-10.1)                                                  | 0.39 (0.24-2.26)        | 33.2 (n.d.-117.3)  | 28.9 (5.1-640.3)      | 0.29 (0.04-1.40) |
| Treated | <b>PA (n = 21)</b>        | 24.9 (3.2-80.7)                                                 | 1.12 (0.23-4.31)        | 78.7 (n.d.-775.2)  | 0.1 (n.d.-1.6)        | 1.72 (0.11-7.00) |
| Treated | <b>MMAmut(0) (n = 4)</b>  | 39.2 (5.0-48.4)                                                 | 1.04 (0.45-1.24)        | 86.6 (31.6-136.3)  | 1727.6 (846.3-3464.4) | 3.65 (0.75-8.85) |
| Treated | <b>MMAmut(-) (n = 11)</b> | 7.3 (3.4-12.0)                                                  | 0.43 (0.20-0.57)        | n.d. (n.d.-41.8)   | 22.8 (4.6-49.6)       | 0.08 (0.02-0.15) |
| Treated | <b>CblA (n = 2)</b>       | 5.9 (5.2-6.6)                                                   | 0.41 (0.30-0.52)        | 27.9 (21.9-33.9)   | 70.0 (10.8-129.2)     | 0.28 (0.16-0.39) |
| Treated | <b>CblB (n = 17)</b>      | 15.6 (1.3-23.3)                                                 | 0.88 (0.08-1.44)        | 40.4 (n.d.-68.8)   | 193.2 (n.d.-460.8)    | 0.32 (n.d.-0.55) |
| Treated | <b>CblC (n = 10)</b>      | 4.3 (1.1-8.8)                                                   | 0.37 (0.08-1.62)        | 24.7 (n.d.-43.1)   | 9.5 (n.d.-78.0)       | 0.11 (n.d.-0.47) |

NBS: newborn screening; PA: propionic acidemia; Cbl: cobalamin; MMAmut: methylmalonyl-CoA mutase deficiency; C3: propionylcarnitine; C2: acetylcarnitine; 3OHPA: 3-hydroxypropionic acid; MMA: methylmalonic acid; MCA: methylcitric acid; n.d.: not detectable.

<https://doi.org/10.1371/journal.pone.0184897.t004>

**Table 5. Results of External Quality Assurance dried blood spot samples (*n* = 7).**

| Biomarker    | Second-tier test |          |          | Diagnosis according to second-tier test result |
|--------------|------------------|----------|----------|------------------------------------------------|
|              | 3OHPA (μM)       | MMA (μM) | MCA (μM) |                                                |
| Cutoff       | 38.13            | 2.29     | 0.08     |                                                |
| ERNDIM No. 1 | 90.33            | n.d.     | 3.36     | PA                                             |
| ERNDIM No. 2 | 35.62            | 4277.03  | 4.30     | MMACBL                                         |
| ERNDIM No. 3 | 91.41            | n.d.     | 2.44     | PA                                             |
| ERNDIM No. 4 | 32.66            | 24.57    | 0.21     | MMACBL                                         |
| ERNDIM No. 5 | 117.15           | 3892.14  | 8.50     | MMACBL                                         |
| ERNDIM No. 6 | 64.79            | 0.98     | 1.32     | PA                                             |
| ERNDIM No. 7 | 39.68            | 24.55    | 0.22     | MMACBL                                         |

3OHPA: 3-hydroxypropionic acid; MMA: methylmalonic acid; MCA: methylcitric acid; n.d.: not detectable; PA: propionic acidemia; MMACBL: methylmalonic acidemia or combined remethylation disorder.

<https://doi.org/10.1371/journal.pone.0184897.t005>

To the best of our knowledge, the LC-MS/MS assay presented here is the first to have multiplexed three relevant biomarkers pathognomonic for PA and MMACBL in DBS (3OHPA, MMA and MCA) in one run, taking into account the separation of the physiological interfering metabolites. Most previous assays using DBS detected MMA and/or MCA, but not in combination with 3OHPA [10–14, 16]. Determination by LC-MS/MS of 3OHPA was reported by two earlier studies which, in contrast with the present method, did not include MCA [15, 17]. To improve quantitation further, we have used a total of three ISs (one for each biomarker) instead of a single IS in these earlier reports [15, 17]. This change may reportedly improve reliability of the assay especially for high analyte levels where, if only one IS is used, suppression of a single IS would affect quantitation of all other analytes [34].

As concerns sample preparation, previous methods generally utilized time-consuming and laborious derivatization steps [10, 11, 13, 14] or liquid-liquid extraction [12]. In our assay, these steps have been eliminated to achieve a very simple and fast (<20 min) sample preparation protocol to minimize errors and increase robustness without any special equipment or further pipetting steps.

Even if our instrument would have been able to perform two-dimensional (2D) chromatography with ultra-high performance, the assay was deliberately developed using one-dimensional (1D) configuration with conventional HPLC settings. This approach, together with simple sample preparation, is expected to improve inter-lab transferability and robustness for an easier inclusion of this assay in the daily routine.

Importantly, due to multiplexing of the biomarkers, our assay allows the evaluation of the individual diagnostic value of 3OHPA, MMA and MCA in the same DBS in the diagnosis and follow-up of PA and MMACBL. As for PA in the present study, MCA was increased all newborn PA samples (*n* = 4) as well as in External Quality Assurance specimens with PA (*n* = 3) and all specimens obtained during therapy (*n* = 21). 3OHPA was also increased in many PA cases. However, in 2 out of 4 untreated newborn PA samples and in 7 out of 21 PA specimens under therapy, only the elevation of MCA, but not 3OHPA, could be detected, in contrast with an earlier study [15]. Of note, PA specimens with elevated MCA but normal 3OHPA originated from PA patients having milder phenotypes. This was also indicated by their lower C3/C2 ratios at time of blood sampling (newborn: range 0.24-0.50, treated: 0.23-0.55) as compared with PA samples having both MCA and 3OHPA increased (newborn: range 0.52-1.94, treated: 0.96-4.31). However, all four newborn PA specimens were subject to long-term storage (range 3.45-8.90 years), leading up to a 95% decrease in the C3 levels, in line with previous reports

[23, 24]. It may therefore be hypothesized that pre-analytical issues could have markedly contributed to the lack of detection of 3OHPA in the two NBS samples. It has not been elucidated in the literature whether alterations of C3 are paralleled with those of 3OHPA, MMA and MCA in DBS stored in the long-term. MMA was reported to be stable for at least 1 year in DBS [12], and MCA for at least 3 weeks [11]. In case of PA patients under treatment, our observations might also be attributable to relative metabolic stability under treatment and concomitant therapy with carnitine increasing the renal elimination of the relevant metabolites [1]. Thus, stored newborn and treated PA samples in our study could only be correctly identified if the decision was based on an elevation of MCA. However, these observations may be irrelevant in the analysis of freshly obtained samples. Therefore, in our ongoing prospective study (“Newborn screening 2020”), we set out to assay emerging fresh specimens from further PA patients with mild or more severe phenotypes to clarify the roles of these factors, as well as the diagnostic value of the biomarkers.

On the other hand, all retrospectively examined newborn ( $n = 10$ ) and External Quality Assurance specimens ( $n = 4$ ) with MMACBL could be clearly distinguished from normal samples based on elevated MMA concentrations; this was accompanied by increased MCA levels in most cases ( $n = 11$  out of 14). MMA levels were only moderately elevated and MCA was normal in one untreated newborn with CblB and two with CblC. MMA was also elevated in most MMACBL samples obtained during therapy ( $n = 39$  out of 44, including four with normal first-tier results); in 32 out of 39 specimens together with increased MCA levels. In five additional patients under treatment (CblB  $n = 3$ ; CblC  $n = 2$ ), the first-tier and second-tier results were both normal. Thus, in our sample set containing both mild and more severe phenotypes, MMA appears to be superior as diagnostic parameter for the detection of MMACBL in DBS samples from NBS, with MCA being complementary and supporting the decision in most but not all cases.

As concerns maternal vitamin B<sub>12</sub> deficiency, such patients are expected to be partially identified by the suggested second-tier strategy, as at least severe cases show elevation of C3 and MMA on NBS [35, 36]. Moreover, a clear benefit of early detection and treatment for both the child and the mother in severe maternal vitamin B<sub>12</sub> deficiency has been reported [37–39]. Thus, in our opinion, the identification of these patients may be regarded as a further advantage of the proposed strategy, in spite of a reported increase in false-positive rates [35–39]. Accordingly, in our prospective study “Newborn screening 2020” maternal vitamin B<sub>12</sub> deficiency is explicitly included as one of the target disorders; the impact on false-positive rates is also under evaluation.

Taken together, our preliminary findings from this retrospective analysis suggest that this assay could reliably identify patients with PA and MMACBL in the present set of NBS samples. Also, most specimens obtained during therapy showed biomarker patterns characteristic for the respective disorder. However, 3OHPA was normal in a relevant number of newborn PA samples—presumably influenced by pre-analytical changes during long-term storage—and also in PA patients under therapy, while MCA could still confirm the presence of PA. As these retrospective results may not be directly applicable for the analysis of freshly obtained samples, the validated assay is being applied prospectively as a second-tier test in our pilot project “Newborn screening 2020” at the University Hospital Heidelberg. In addition, that prospective study is expected to provide data on effects of the presented second-tier strategy in NBS on false-positive rates, frequency of recalls and time to diagnosis. More experience in such larger studies representing a wider range of disorders and prospective evaluation of the described method are needed to clarify the relevance of each biomarker in DBS, the reliability of the presented assay to identify patients in the NBS setting and the potential effect on false-positive rates in premature and term newborns.

## Conclusions

In conclusion, an LC-MS/MS assay has been developed for the concurrent determination of the relevant biomarkers pathognomonic for PA and MMACBL in DBS (3OHPA, MMA and MCA), while separating the interfering metabolites lactic acid and succinic acid. Sample preparation is simple and fast (<20 min); no special equipment, derivatization or complicated pipetting steps are required. The assay can use the same DBS specimen as in the primary screening and can therefore be integrated in NBS as a second-tier test to reduce the number of recalls. The method was validated using clinical samples from known patients (newborn specimens before therapy and samples under treatment) and External Quality Assurance specimens. The presented preliminary findings suggest that application of this assay can reliably identify and differentiate patients with PA and MMACBL in NBS samples. The validated assay is currently being evaluated prospectively as second-tier test in a pilot project for the extension of the German NBS panel ("Newborn screening 2020") at the NBS Center of the University Hospital Heidelberg.

## Supporting information

**S1 Text. Preparation of unlabelled standard and internal standard solutions, dried blood spot calibrators and quality controls.**

(DOC)

**S1 Table. Extended details of method development.**

(DOC)

## Acknowledgments

Participation of all subjects in the current study is greatly acknowledged.

## Author Contributions

**Conceptualization:** Stefan Kölker, Georg F. Hoffmann, Gwendolyn Gramer, Jürgen G. Okun.

**Data curation:** Péter Monostori, Glynis Klinke, Sylvia Richter, Ákos Baráth, Ralph Fingerhut, Gwendolyn Gramer, Jürgen G. Okun.

**Formal analysis:** Péter Monostori, Glynis Klinke.

**Funding acquisition:** Stefan Kölker, Georg F. Hoffmann, Gwendolyn Gramer, Jürgen G. Okun.

**Investigation:** Péter Monostori, Glynis Klinke, Sylvia Richter, Ákos Baráth, Ralph Fingerhut.

**Methodology:** Péter Monostori, Glynis Klinke, Sylvia Richter, Gwendolyn Gramer, Jürgen G. Okun.

**Project administration:** Stefan Kölker, Georg F. Hoffmann, Gwendolyn Gramer, Jürgen G. Okun.

**Resources:** Georg F. Hoffmann, Jürgen G. Okun.

**Supervision:** Matthias R. Baumgartner, Georg F. Hoffmann, Gwendolyn Gramer, Jürgen G. Okun.

**Validation:** Péter Monostori, Glynis Klinke, Sylvia Richter, Gwendolyn Gramer, Jürgen G. Okun.

**Visualization:** Péter Monostori, Glynis Klinke.

**Writing – original draft:** Péter Monostori, Glynis Klinke, Sylvia Richter, Gwendolyn Gramer, Jürgen G. Okun.

**Writing – review & editing:** Ákos Baráth, Ralph Fingerhut, Matthias R. Baumgartner, Stefan Kölker, Georg F. Hoffmann.

## References

1. Baumgartner MR, Hörster F, Dionisi-Vici C, Haliloglu G, Karall D, Chapman KA, et al. Proposed guidelines for the diagnosis and management of methylmalonic and propionic acidemia. *Orphanet J Rare Dis.* 2014; 9: 130. <https://doi.org/10.1186/s13023-014-0130-8> PMID: 25205257
2. Therrell BL, Padilla CD, Loeber JG, Kneisser I, Saadallah A, Borrajo GJ, et al. Current status of newborn screening worldwide: 2015. *Semin Perinatol.* 2015; 39: 171–187. <https://doi.org/10.1053/j.semperi.2015.03.002> PMID: 25979780
3. Dietzen DJ, Rinaldo P, Whitley RJ, Rhead WJ, Hannon WH, Garg UC, et al. National academy of clinical biochemistry laboratory medicine practice guidelines: follow-up testing for metabolic disease identified by expanded newborn screening using tandem mass spectrometry; executive summary. *Clin Chem.* 2009; 55: 1615–1626. <https://doi.org/10.1373/clinchem.2009.131300> PMID: 19574465
4. Loeber JG, Burgard P, Cornel MC, Rigter T, Weinreich SS, Rupp K, et al. Newborn screening programmes in Europe; arguments and efforts regarding harmonization. Part 1. From blood spot to screening result. *J Inherit Metab Dis.* 2012; 35: 603–611. <https://doi.org/10.1007/s10545-012-9483-0> PMID: 22552820
5. Kölker S, Garcia-Cazorla A, Valayannopoulos V, Lund AM, Burlina AB, Sykut-Cegielska J, et al. The phenotypic spectrum of organic acidurias and urea cycle disorders. Part 1: the initial presentation. *J Inherit Metab Dis.* 2015; 38: 1041–1057. <https://doi.org/10.1007/s10545-015-9839-3> PMID: 25875215
6. Kölker S, Valayannopoulos V, Burlina AB, Sykut-Cegielska J, Wijburg FA, Teles EL, et al. The phenotypic spectrum of organic acidurias and urea cycle disorders. Part 2: the evolving clinical phenotype. *J Inherit Metab Dis.* 2015; 38: 1059–1074. <https://doi.org/10.1007/s10545-015-9840-x> PMID: 25875216
7. Slaughter JL, Meinzen-Derr J, Rose SR, Leslie ND, Chandrasekar R, Linard SM, et al. The effects of gestational age and birth weight on false-positive newborn-screening rates. *Pediatrics.* 2010; 126: 910–916. <https://doi.org/10.1542/peds.2010-0943> PMID: 20974783
8. Lindner M, Ho S, Kölker S, Abdoh G, Hoffmann GF, Burgard P. Newborn screening for methylmalonic acidurias—optimization by statistical parameter combination. *J Inherit Metab Dis.* 2008; 31: 379–385. <https://doi.org/10.1007/s10545-008-0892-z> PMID: 18563635
9. Matern D, Tortorelli S, Oglesbee D, Gavrillov D, Rinaldo P. Reduction of the false-positive rate in newborn screening by implementation of MS/MS-based second-tier tests: the Mayo Clinic experience (2004–2007). *J Inherit Metab Dis.* 2007; 30: 585–592. <https://doi.org/10.1007/s10545-007-0691-y> PMID: 17643193
10. de Sain-van der Velden MG, van der Ham M, Jans JJ, Visser G, van Hasselt PM, Prinsen HC, et al. Suitability of methylmalonic acid and total homocysteine analysis in dried bloodspots. *Anal Chim Acta.* 2015; 853: 435–441. <https://doi.org/10.1016/j.aca.2014.10.043> PMID: 25467488
11. Al-Dirbashi OY, McIntosh N, McRoberts C, Fisher L, Rashed MS, Makhseed N, et al. Analysis of methylcitrate in dried blood spots by liquid chromatography-tandem mass spectrometry. *JIMD Rep.* 2014; 16: 65–73. [https://doi.org/10.1007/8904\\_2014\\_321](https://doi.org/10.1007/8904_2014_321) PMID: 24997714
12. Schroder TH, Quay TA, Lamers Y. Methylmalonic acid quantified in dried blood spots provides a precise, valid, and stable measure of functional vitamin B-12 status in healthy women. *J Nutr.* 2014; 144: 1658–1663. <https://doi.org/10.3945/jn.114.194829> PMID: 25143369
13. Turgeon CT, Magera MJ, Cuthbert CD, Loken PR, Gavrillov DK, Tortorelli S, et al. Determination of total homocysteine, methylmalonic acid, and 2-methylcitric acid in dried blood spots by tandem mass spectrometry. *Clin Chem.* 2010; 56: 1686–1695. <https://doi.org/10.1373/clinchem.2010.148957> PMID: 20807894
14. Shigematsu Y, Hata I, Tajima G. Useful second-tier tests in expanded newborn screening of isovaleric acidemia and methylmalonic aciduria. *J Inherit Metab Dis.* 2010; 33: Suppl 2: S283–288. <https://doi.org/10.1007/s10545-010-9111-9> PMID: 20440648
15. la Marca G, Malvagia S, Pasquini E, Innocenti M, Donati MA, Zammarchi E. Rapid 2nd-tier test for measurement of 3-OH-propionic and methylmalonic acids on dried blood spots: reducing the false-positive rate for propionylcarnitine during expanded newborn screening by liquid chromatography-tandem mass

- spectrometry. *Clin Chem*. 2007; 53: 1364–1369. <https://doi.org/10.1373/clinchem.2007.087775> PMID: 17510301
16. Lim JS, Tan ES, John CM, Poh S, Yeo SJ, Ang JS, et al. Inborn Error of Metabolism (IEM) screening in Singapore by electrospray ionization-tandem mass spectrometry (ESI/MS/MS): An 8 year journey from pilot to current program. *Mol Genet Metab*. 2014; 113: 53–61. <https://doi.org/10.1016/j.ymgme.2014.07.018> PMID: 25102806
  17. Röschinger W, Sonnenschein S, Schuhmann E, Nennstiel-Ratzel U, Roscher AA, Olgemöller B. Neue Zielerkrankungen im Neugeborenen-Screening. Empfehlungen aus einem Pilotprojekt [New target diseases in newborn screening. Recommendations derived from a pilot study]. *Monatsschr Kinderheilkd*. 2015; 163: 142–149.
  18. Schulze A, Lindner M, Kohlmüller D, Olgemöller K, Mayatepek E, Hoffmann GF. Expanded newborn screening for inborn errors of metabolism by electrospray ionization-tandem mass spectrometry: results, outcome, and implications. *Pediatrics*. 2003; 111: 1399–1406. PMID: 12777559
  19. Papp F, Rózsa M, Wittmann Gy, Baráth Á, Monostori P, Görög M, et al. Anyagcsere betegségek újszülöttkori szűrése és klinikai jellemzőik [Newborn screening for metabolic diseases and their clinical features]. *Egészségtudomány*. 2011; 55: 19–37.
  20. Torresani T, Steinmann B. Jahresbericht 2006: Neugeborenen-Screening in der Schweiz. *Paediatrica*. 2007; 18: 56.
  21. Krawczyk H, Gradowska W. <sup>1</sup>H NMR spectra of methylcitric acid in urine. *J Inherit Metab Dis*. 2007; 30: 263. <https://doi.org/10.1007/s10545-007-0420-6> PMID: 17295121
  22. Podebrad F, Heil M, Scharrer A, Feldmer S, Schulte-Mäter O, Mosandl A, et al. Analysis of methylcitric acid by enantioselective multidimensional gas chromatography-mass spectrometry. *J High Resol Chromatogr*. 1999; 22: 604–608.
  23. Strnadová KA, Holub M, Mühl A, Heinze G, Ratschmann R, Mascher H, et al. Long-term stability of amino acids and acylcarnitines in dried blood spots. *Clin Chem*. 2007; 53: 717–722. <https://doi.org/10.1373/clinchem.2006.076679> PMID: 17272485
  24. Fingerhut R, Ensenauer R, Röschinger W, Arnecke R, Olgemöller B, Roscher AA. Stability of acylcarnitines and free carnitine in dried blood samples: implications for retrospective diagnosis of inborn errors of metabolism and neonatal screening for carnitine transporter deficiency. *Anal Chem*. 2009; 81: 3571–3575. <https://doi.org/10.1021/ac8022235> PMID: 19323528
  25. Heringer J, Valayannopoulos V, Lund AM, Wijburg FA, Freisinger P, Barić I, et al. Impact of age at onset and newborn screening on outcome in organic acidurias. *J Inherit Metab Dis*. 2016; 39: 341–353. <https://doi.org/10.1007/s10545-015-9907-8> PMID: 26689403
  26. Hörster F, Kölker S, Loeber JG, Cornel MC, Hoffmann GF, Burgard P. Newborn screening programmes in Europe, arguments and efforts regarding harmonisation: Focus on organic acidurias. *JIMD Rep*. 2017; 32: 105–115. [https://doi.org/10.1007/8904\\_2016\\_537](https://doi.org/10.1007/8904_2016_537) PMID: 27344647
  27. Estrella J, Wilcken B, Carpenter K, Bhattacharya K, Tchan M, Wiley V. Expanded newborn screening in New South Wales: missed cases. *J Inherit Metab Dis*. 2014; 37: 881–887. <https://doi.org/10.1007/s10545-014-9727-2> PMID: 24970580
  28. Lo SY, Gordon C, Sadilkova K, Jack RM, Dickerson JA. Quantifying MMA by SLE LC-MS/MS: Unexpected challenges in assay development. *Clin Biochem*. 2016; 49: 967–972. <https://doi.org/10.1016/j.clinbiochem.2016.05.010> PMID: 27208560
  29. Fu X, Xu YK, Chan P, Pattengale PK. Simple, fast, and simultaneous detection of plasma total homocysteine, methylmalonic acid, methionine, and 2-methylcitric acid using liquid chromatography and mass spectrometry (LC/MS/MS). *JIMD Rep*. 2013; 10: 69–78. [https://doi.org/10.1007/8904\\_2012\\_205](https://doi.org/10.1007/8904_2012_205) PMID: 23430805
  30. Wagner M, Tonoli D, Varesio E, Hopfgartner G. The use of mass spectrometry to analyze dried blood spots. *Mass Spectrom Rev*. 2016; 35: 361–438. <https://doi.org/10.1002/mas.21441> PMID: 25252132
  31. Al-Dirbashi OY, McIntosh N, Chakraborty P. Quantification of 2-methylcitric acid in dried blood spots improves newborn screening for propionic and methylmalonic acidemias. *J Med Screen*. 2017; 24: 58–61. <https://doi.org/10.1177/0969141316645824> PMID: 27216769
  32. Goldenberg AJ, Comeau AM, Grosse SD, Tanksley S, Prosser LA, Ojodu J, et al. Evaluating harms in the assessment of net benefit: A framework for newborn screening condition review. *Matern Child Health J*. 2016; 20: 693–700. <https://doi.org/10.1007/s10995-015-1869-9> PMID: 26833040
  33. Dhondt JL. Expanded newborn screening: social and ethical issues. *J Inherit Metab Dis*. 2010; 33: Suppl 2: S211–217. <https://doi.org/10.1007/s10545-010-9138-y> PMID: 20544288
  34. Remane D, Wissenbach DK, Meyer MR, Maurer HH. Systematic investigation of ion suppression and enhancement effects of fourteen stable-isotope-labeled internal standards by their native analogues using atmospheric-pressure chemical ionization and electrospray ionization and the relevance for multi-

- analyte liquid chromatographic/mass spectrometric procedures. *Rapid Commun Mass Spectrom*. 2010; 24: 859–867. <https://doi.org/10.1002/rcm.4459> PMID: 20196193
35. Scolamiero E, Villani GR, Ingenito L, Pecce R, Albano L, Caterino M, et al. Maternal vitamin B12 deficiency detected in expanded newborn screening. *Clin Biochem*. 2014; 47: 312–317. <https://doi.org/10.1016/j.clinbiochem.2014.08.020> PMID: 25204964
  36. Hinton CF, Ojodu JA, Fernhoff PM, Rasmussen SA, Scanlon KS, Hannon WH. Maternal and neonatal vitamin B12 deficiency detected through expanded newborn screening—United States, 2003–2007. *J Pediatr*. 2010; 157: 162–163. <https://doi.org/10.1016/j.jpeds.2010.03.006> PMID: 20400092
  37. Singh G, Le D, Schnabl K, Leaker MT, Steele M, Sparkes RL. Vitamin B12 Deficiency in Infancy: The Case for Screening. *Pediatr Blood Cancer*. 2016; 63: 740–742. <https://doi.org/10.1002/pbc.25828> PMID: 26806811
  38. Jain R, Singh A, Mittal M, Talukdar B. Vitamin B12 deficiency in children: a treatable cause of neurodevelopmental delay. *J Child Neurol*. 2015; 30: 641–643. <https://doi.org/10.1177/0883073813516194> PMID: 24453156
  39. Whitehead VM. Acquired and inherited disorders of cobalamin and folate in children. *Br J Haematol*. 2006; 134: 125–136. <https://doi.org/10.1111/j.1365-2141.2006.06133.x> PMID: 16846473
